# Supplementary material for: The fluorine gauche effect. Langmuir isotherms report the relative conformational stability of (±)-erythro- and (±)-threo-9,10-difluorostearic acidsElectronic supplementary information (ESI) available: characterisation of compounds 4, 5, 7–9, 11–13. See http://www.rsc.org/suppdata/cc/b2/b202891c/
Source: Royal Society of Chemistry journal article supplement (doi:10.1039/b202891c), 2002-05-07
Supplement: b202891c.doc [file b202891c.doc]

# Supplementary data

**Methyl *cis*-9,10-epoxyoctadecanoate 7.** *m*CPBA (3.04 g, 17.6 mmol) was added in small portions to a solution of methyl *cis*-9-octadecenoate (methyl oleate) **6** (4.00 g, 13.5 mmol) in CH2Cl2 (100 ml) at 0 oC under a N2 atmosphere. The reaction mixture was stirred for 21 h at room temperature, cooled to 0 oC, and then quenched with a 20 % Na2S2O3 solution. The mixture was stirred for 2h, and then the organic products were extracted into CH2Cl2 (3x30 ml). The combined organic layers were washed with a 15 % NaOH (3x30 ml) and water (3x30 ml). Drying over MgSO4 and concentration under reduced pressure gave the the title compound **7** (3.55 g, 84 %) as clear oil. **1H NMR**  (CDCl3): 0.81 (3H, t, *3J*(H,H)= 7.0 Hz, CH3), 1.12-1.62 (26H, m), 2.23 (2H, t, *3J*(H,H)= 7.3 Hz, CH2CO2CH3), 2.83 (2H, m, CHOCH), 3.60 (3H, s, OCH3); **13C NMR**  (CDCl3): 14.5 (CH3), 23.0, 25.3, 26.9, 27.0, 28.2, 29.4, 29.5, 29.6, 29.7, 29.9, 32.2, 34.4, 51.8 (OCH3), 57.5 (CHOCH), 57.6 (CHOCH), 174.6 (C=O). **MS** m/z (%, CI+, 70 eV): 313 (69)[MH+], 295 (100)[MH+ - H2O]; **IR**  (KBr): 2926, 2856, 1742 (C=O), 1463, 1437, 1247, 1198, 1171.

**Methyl ()-*threo*-9-hydroxy-10-fluorooctadecanoate 8.** HF-pyridine complex (1.31 g, 5.06 mmol) was added to a solution methyl *cis*-9,10-epoxyoctadecanoate **7** (1.00 g, 3.37 mmol) in CH2Cl2 (12 ml) under a N2 atmosphere. The reaction mixture was stirred for 45 min, and then quenched with water (30 ml). The mixture was neutralised with the addition of a small portion of solid NaHCO3, and then organic products were extracted into CH2Cl2 (3x40 ml). Combined extracts were dried over MgSO4, and concentrated under reduced pressure to give a residue, which was purified by column chromatography (over silica gel). The title compound **8** (742 mg, 66 %) was obtained as a white amorphous solid, some of which was re-crystallisation from hexane. **m.p.** 63-65 oC;**19F NMR**  (CDCl3): -195.1 (m); **1H NMR**  (CDCl3): 0.81 (3H, t, *3J*(H,H)= 7.2 Hz, CH3), 1.12-1.70 (26H, m), 2.23 (2H, t, *3J*(H,H)= 7.7 Hz, CH2CO2CH3), 3.60 (3H, s, OCH3), 2.90-3.56 (1H, m, CHOH), 4.31 (1H, ddm, *2J*(H,F)= 44.6 Hz, *3J*(H,F)= 4.0 Hz, CFH); **13C NMR**  (CDCl3): 14.1 (CH3), 22.6, 24.8, 25.0, 25.1, 25.4, 29.0, 29.1, 29.4, 29.6, 30.1, 31.2, 32.3, 32.8, 34.0, 51.4 (OCH3), 73.0 (d, *2J*(F,C)= 19.5 Hz, CHOH), 96.5 (d, *J*(F,C)= 169.5 Hz, CHF), 174.3 (C=O). **MS** m/z (%, CI+, 70 eV): 333 (86)[MH+], 313 (100)[MH+ - HF], 295 (31)[MH+ - (HF and H2O)]; **IR**  (KBr): 3334 (OH), 2925, 2854, 1741 (C=O), 1465, 1173, 1077.

**Methyl ()-*erythro*-9,10-difluorooctadecanoate 9.** A solution of methyl ()-*threo*-9-hydroxy-10-fluorooctadecanoate **8** (967 mg, 2.91 mmol) in CH2Cl2 (20 ml) was added to a solution of DAST (751 mg, 4.66 mmol) in CH2Cl2 (30) at -78 oC under a N2 atmosphere. The reaction mixture was left to warm to room temperature, and was then stirred for 5h. After cooling to 0 oC, the reaction was quenched with water, and concentrated under reduced pressure. The residue was dissolved in hexane(100 ml) and then washed with saturated NaHCO3 (3x 30 ml) and water (3x30 ml). Drying over MgSO4 and concentration under reduced pressure gave a residue, which was accompanied by the elimination product (~50 %). The elimination product was removed by ozonolysis, by dissolving the residue in CH2Cl2 (50 ml) and bubbling ozone (O3) at -78 oC until a light-blue colour persisted. The ozonide was then treated with 30 % H2O2 (10 ml) and 2.5 M NaOH (10 ml), and the excess H2O2 was quenched with solid Na2S2O3. Organic products were then extracted into hexane (3x30 ml), dried over MgSO4, and concentrated under reduced pressure to give a residue, which was further purified over silica gel. This gave the title compound **9** (248 mg, 25 %) %) as a clear oil, which solidified on standing. **m.p.** 33-35 oC;**19F NMR**  (CDCl3): -193.1 (m); **1H NMR**  (CDCl3): 0.81 (3H, t, *3J*(H,H)= 7.0 Hz, CH3), 1.10-1.80 (26H, m), 2.24 (2H, t, *3J*(H,H)= 7.7 Hz, CH2CO2CH3), 3.60 (3H, s, OCH3), 4.20-4.60 (2H, m, CFHCFH); **13C NMR**  (CDCl3): 14.1 (CH3), 22.7, 24.9, 25.0, 25.1, 29.0, 29.2, 29.4, 30.0 (d, *2J*(F,C)= 12.2 Hz, CH2), 30.1, 30.3 (d, *2J*(F,C)= 12.2 Hz, CH2), 30.4, 31.9, 34.1, 51.5 (OCH3), 93.7 (dd, *J*(F,C)= 172.1 Hz, *2J*(F,C)= 25.6 Hz, CHF), 93.8 (dd, *J*(F,C)= 177.0 Hz, *2J*(D,C)= 25.6 Hz, CHF), 174.3 (C=O). **MS** m/z (%, CI+, 70 eV): 335 (86)[MH+], 295 (100)[MH+ - 2HF]; **Accurate mass** (CI+): Found 335.277251, Calculated for (MH+) 335.276162 (-3.2 ppm); **IR**  (KBr): 2924, 2855, 1742 (C=O), 1467, 1437, 1172, 1071, 1003.

**()-*Erythro*-9,10-difluorooctadecanoic acid 4.** A solution of methyl ()-*erythro*-9,10-difluorooctadecanoate **9** (248 mg, 0.74 mmol) in a 1:1 mixture of methanol (15 ml) and NaOH (2.5 M, 15 ml) was heated under refluxed for 17h. The reaction mixture was cooled to 0 oC, made acidic with concentrated HCl (5 ml), and then concentrated under reduced pressure. The organic products were extracted into diethyl ether (3x30 ml), dried over MgSO4, and concentrated under reduced pressure to give a residue, which was purified both by column chromatography (silica gel) and re-crystallisation from hexane. This afforded the title compound **4** (141 mg, 60 %) as an amorphous white solid. **m.p.** 67-69 oC;**19F NMR**  (CDCl3): -193.1 (m, 86 %); **1H NMR**  (CDCl3): 0.81 (3H, t, *3J*(H,H)= 7.0 Hz, CH3), 1.14-1.80 (27H, m), 2.28 (2H, t, *3J*(H,H)= 7.5 Hz, CH2CO2H), 4.20-4.60 (2H, m, CFHCFH); **13C NMR**  (CDCl3): 14.1 (CH3), 22.7, 24.6, 25.0 (d, *4J*(F,C)= 2.4 Hz, CH2), 25.1 (d, *4J*(F,C)= 2.4 Hz, CH2), 28.9, 29.1, 29.2, 29.4, 30.1 (dd, *2J*(F,C)= 7.3 Hz, *3J*(F,C)= 4.9 Hz, CH2), 30.3 (dd, *2J*(F,C)= 7.3 Hz, *3J*(F,C)= 4.9 Hz, CH2), 31.9, 33.9, 93.8 (dd, *J*(F,C)= 175.8 Hz, *2J*(F,C)= 25.6 Hz, CHF), 179.4 (C=O). **MS** m/z (%, CI+, 70 eV): 321 (5)[MH+], 281 (100)[MH+ - 2HF]; **Accurate mass** (CI+): Found 281.247169, Calculated for (MH+-2HF) 281.248056 (3.2 ppm); **IR**  (KBr): 3417 (OH), 2923, 2852, 1705 (C=O), 1468, 1069.

**Methyl *trans*-9,10-epoxyoctadecanoate 11.** *m*CPBA (756 mg, 4.38 mmol) was added in small portions to a solution of methyl *trans*-9-octadecenoate (methyl elaidate) **10** (1.00 g, 3.37 mmol) in CH2Cl2 (50 ml) at 0 oC under a N2 atmosphere. The reaction mixture was stirred for 21 h at room temperature, cooled to 0 oC, and then quenched with a 20 % Na2S2O3 solution. The mixture was stirred for 2h, and then the organic products were extracted into CH2Cl2 (3x30 ml). The combined organic layers were washed with a 15 % NaOH (3x30 ml) and water (3x30 ml). Drying over MgSO4 and concentration under reduced pressure gave the title compound **11** (1.00 g, 96 %) as clear oil, which solidified on standing. **m.p.** 31-32 oC;**1H NMR**  (CDCl3): 0.81 (3H, t, *3J*(H,H)= 7.0 Hz, CH3), 1.12-1.62 (26H, m), 2.23 (2H, t, *3J*(H,H)= 7.3 Hz, CH2CO2CH3), 2.56 (1H, t, *3J*(H,H)= 1.9 Hz, CHOCH), 2.59 (1H, t, *3J*(H,H)= 2.0 Hz, CHOCH), 3.60 (3H, s, OCH3); **13C NMR**  (CDCl3): 14.4 (CH3), 23.0, 25.3, 26.3, 26.4, 29.4, 29.5, 29.6, 29.8, 29.9, 32.2, 32.5, 34.4, 51.8 (OCH3), 59.2 (CHOCH), 59.3 (CHOCH), 174.6 (C=O). **MS** m/z (%, CI+, 70 eV): 313 (49)[MH+], 295 (100)[MH+ - H2O]; **IR**  (KBr): 2926, 2850, 1740 (C=O), 1468, 1180, 879.

**Methyl ()-*erythro*-9-hydroxy-10-fluorooctadecanoate 12.** HF-pyridine complex (1.31 g, 5.06 mmol) was added to a solution of methyl *trans*-9,10-epoxyoctadecanoate **11** (1.05 g, 3.37 mmol) in CH2Cl2 (12 ml) under a N2 atmosphere. The reaction mixture was stirred for 4h, and then quenched with water (30 ml). The mixture was neutralised with the addition of a small portion of solid NaHCO3, and then organic products were extracted into CH2Cl2 (3x40 ml). Combined extracts were dried over MgSO4, and concentrated under reduced pressure to give a residue, which was purified by dry-flash column chromatography (silica gel). This gave the title compound **12** (954 mg, 85 %) as a white-waxy solid. **m.p.** 29-30 oC;**19F NMR**  (CDCl3): -191.3 (m); **1H NMR**  (CDCl3): 0.81 (3H, t, *3J*(H,H)= 7.0 Hz, CH3), 1.14-1.74 (26H, m), 2.30 (2H, t, *3J*(H,H)= 7.4 Hz, CH2CO2CH3), 3.60 (3H, s, OCH3), 3.58-3.72 (1H, m, CHOH), 4.32 (1H, ddm, *2J*(H,F)= 48.1 Hz, *3J*(H,F)= 9.5 Hz, CFH); **13C NMR**  (CDCl3): 14.4 (CH3), 23.0, 25.2, 25.6, 26.0, 29.4, 29.6, 29.8, 29.9, 30.1, 30.2, 30.9, 32.1, 32.2, 34.4, 51.7 (OCH3), 73.2 (d, *2J*(F,C)= 20.7 Hz, CHOH), 97.0 (d, *J*(F,C)= 172.6 Hz, CHF), 174.5 (C=O). **MS** m/z (%, CI+, 70 eV): 333 (62)[MH+], 313 (100)[MH+ - HF], 295 (64)[MH+ - (HF and H2O)]; **IR**  (KBr): 3407 (OH), 2925, 2854, 1741 (C=O), 1465, 1438, 1173, 1071.

**Methyl ()-*threo*-9,10-difluorooctadecanoate 13.** A solution of methyl ()-*erythro*-9-hydroxy-10-fluorooctadecanoate **12** (638 mg, 1.92 mmol) in CH2Cl2 (15 ml) was added to a solution of DAST (464 mg, 2.88 mmol) in CH2Cl2 (35) at -78 oC under N2 atmosphere. The reaction mixture was left to warm to room temperature, and was then stirred for 1h. After cooling to 0 oC, the reaction mixture was quenched with distilled water, and concentrated under reduce pressure. The residue was dissolved in hexane(100 ml) and then washed with saturated NaHCO3 (3x 30 ml) and distilled water (3x30 ml). Drying over MgSO4 and concentration under reduced pressure gave a residue, which was accompanied by the elimination product (~50 %). The elimination product was removed by ozonolysis by dissolving the residue in CH2Cl2 (50 ml), and then bubbling ozone (O3) at -78 oC until a light-blue colour persisted. The ozonide was then treated with 30 % H2O2 (15 ml) and 2.5 M NaOH (15 ml), and the excess H2O2 was quenched with solid Na2S2O3. Organic products were then extracted into hexane (3x30 ml), dried over MgSO4, and concentrated under reduced pressure to give a residue, which was further purified over silica gel. This gave the title compound **13** (216 mg, 34 %) as an amorphous white solid. **m.p.** 49-55 oC;**19F NMR**  (CDCl3): -196.6 (m); **1H NMR**  (CDCl3): 0.88 (3H, t, *3J*(H,H)= 5.4 Hz, CH3), 1.20-1.86 (26H, m), 2.30 (2H, t, *3J*(H,H)= 7.5 Hz, CH2CO2CH3), 3.67 (3H, s, OCH3), 4.20-4.60 (2H, m, CFHCFH); **13C NMR**  (CDCl3): 14.5 (CH3), 23.0, 25.2, 25.3, 25.4, 29.3, 29.4, 29.5, 29.8, 30.8 (d, *2J*(F,C)= 20.8 Hz, CH2), 30.9 (d, *2J*(F,C)= 20.6 Hz, CH2), 32.2, 34.4, 51.8 (OCH3), 93.6 (dd, *J*(F,C)= 179.6 Hz, *2J*(F,C)= 20.7 Hz, CHF), 93.8 (dd, *J*(F,C)= 179.6 Hz, *2J*(D,C)= 20.7 Hz, CHF), 174.6 (C=O). MS m/z (%, CI+, 70 eV): 335 (71)[MH+], 295 (100)[MH+ - 2HF]; **Accurate mass** (CI+): Found 335.275308, Calculated for (MH+) 335.276162 (2.5 ppm).

**()-*Threo*-9,10-difluorooctadecanoic acid 5.** A solution of methyl ()-*threo-*9,10-difluorooctadecanoate **13** (216 mg, 0.65 mmol) in a 1:1 mixture of methanol (15 ml) and NaOH (2.5 M, 15 ml) was heated under refluxed for 17h. The reaction mixture was cooled to 0 oC, made acidic with concentrated HCl (5 ml), and then concentrated under reduced pressure. The organic products were extracted into diethyl ether (3x30 ml)., dried over MgSO4, and concentrated under reduced pressure to give a residue, which was purified by dry-flash column chromatography (silica gel). This afforded the title compound **5** (143 mg, 69 %) as an amorphous white-solid. **m.p.** 86-88 oC;**19F NMR**  (CDCl3): -196.5 (m, 90 %); **1H NMR**  (CDCl3): 1.0 (3H, t, *3J*(H,H)= 6.3 Hz, CH3), 1.30-2.0 (27H, m), 2.46 (2H, t, *3J*(H,H)= 7.8 Hz, CH2CO2H), 4.30-4.70 (2H, m, CFHCFH); **13C NMR**  (CDCl3): 14.1 (CH3), 22.6, 24.6, 24.8, 24.9, 25.0, 28.8, 29.0, 29.1, 29.2, 29.4, 30.4 (dd, *2J*(F,C)= 20.7 Hz, *3J*(F,C)= 2.4 Hz, CH2), 30.5 (dd, *2J*(F,C)= 20.6 Hz, *3J*(F,C)= 2.4 Hz, CH2), 31.8, 34.0, 93.3 (dd, *J*(F,C)= 176.9 Hz, *2J*(F,C)= 20.8 Hz, CHF), 93.4 (dd, *J*(F,C)= 176.4 Hz, *2J*(D,C)= 20.8 Hz, CHF), 180 (C=O). **MS** m/z (%, CI+, 70 eV): 321 (18)[MH+], 281 (100)[MH+ - 2HF]; **Accurate mass** (CI+): Found 281.247596, Calculated for (MH+-2HF) 281.248056 (1.6 ppm); **IR**  (KBr): 3420 (OH), 2954, 2920, 2850, 1692 (C=O), 1469, 1440, 1073.
